# Supplementary material
Source: publisher figshare collection journal article supplement (https://acs.figshare.com/ndownloader/files/4325224)
Supplement: Supplementary file 1 [file 4325224]

## **Supplementary Information**

### **Development of Cationic Lipid-Conjugated Haloperidol Derivatives as Sigma Receptor Targeted Anticancer Therapeutics**

Krishnendu Pal, Subrata Kumar Pore, Sutapa Sinha, Rajiv Janardhanan, Debabrata Mukhopadhyay,  
Rajkumar Banerjee

**Figure S1**

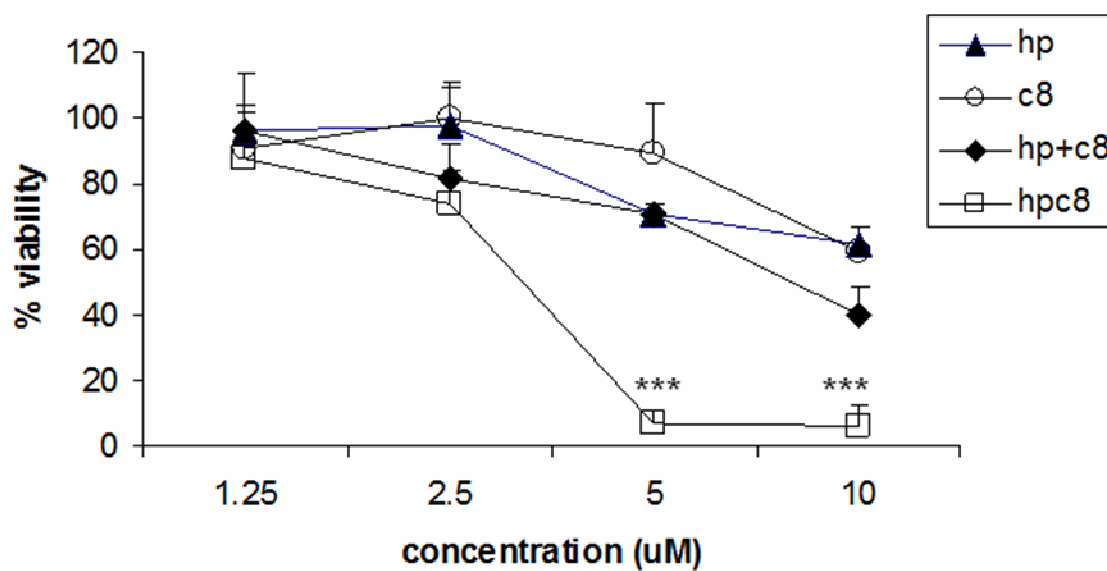

**Figure S1:** Viability studies of B16F10 cells continuously treated with a range of concentrations of haloperidol (▲), C8-molecule (○), HP + C8 (◆), and HP-C8 (□) respectively for 48 hours. \*\*\* denotes  $p < 0.001$ .

<sup>1</sup>H NMR spectrum of HP-C4

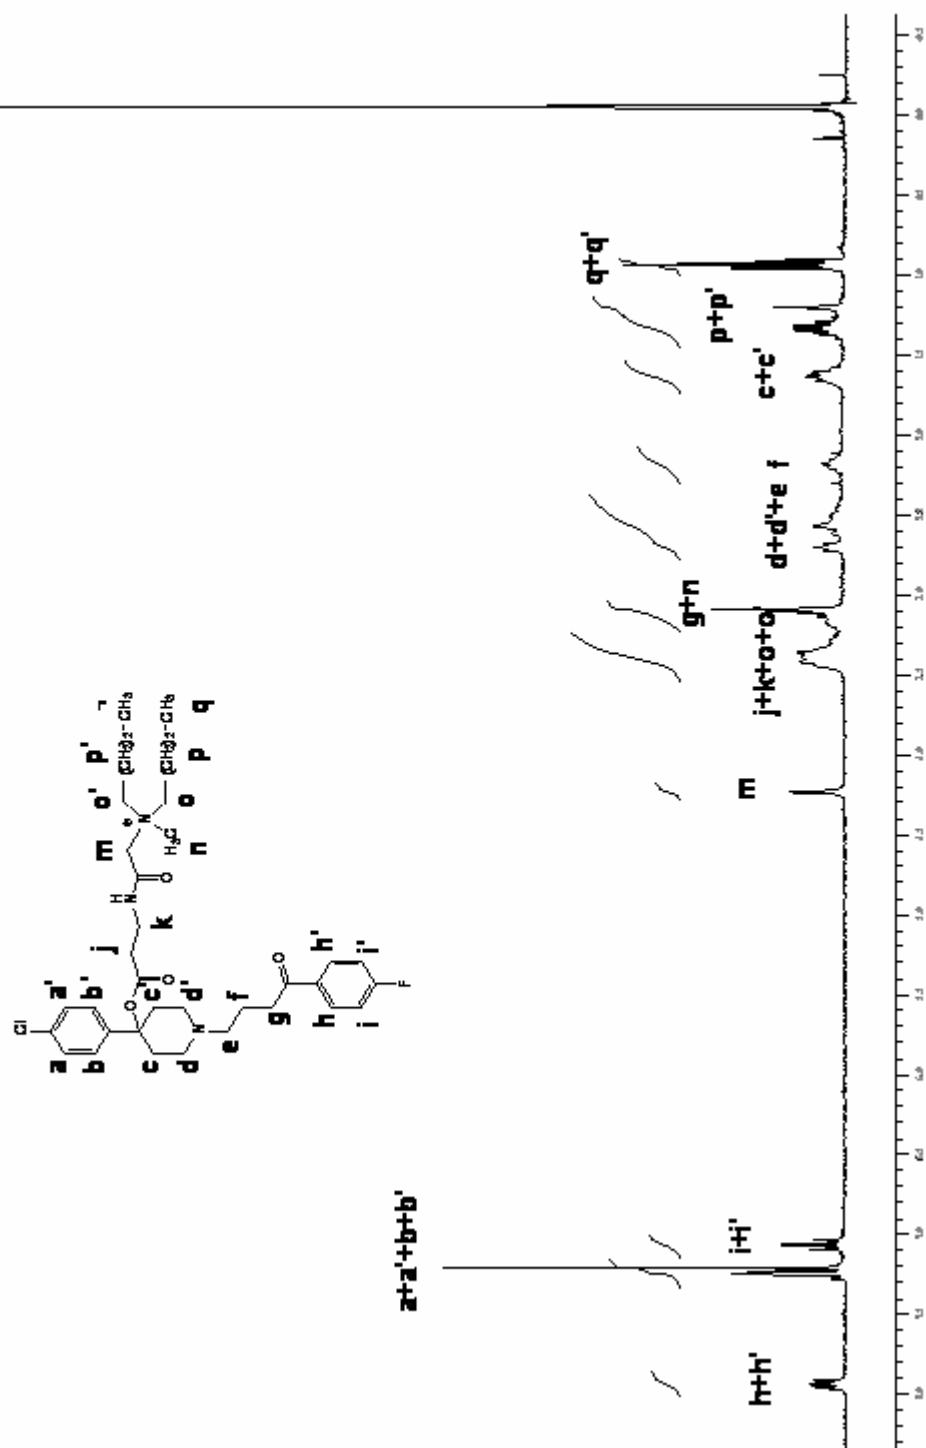

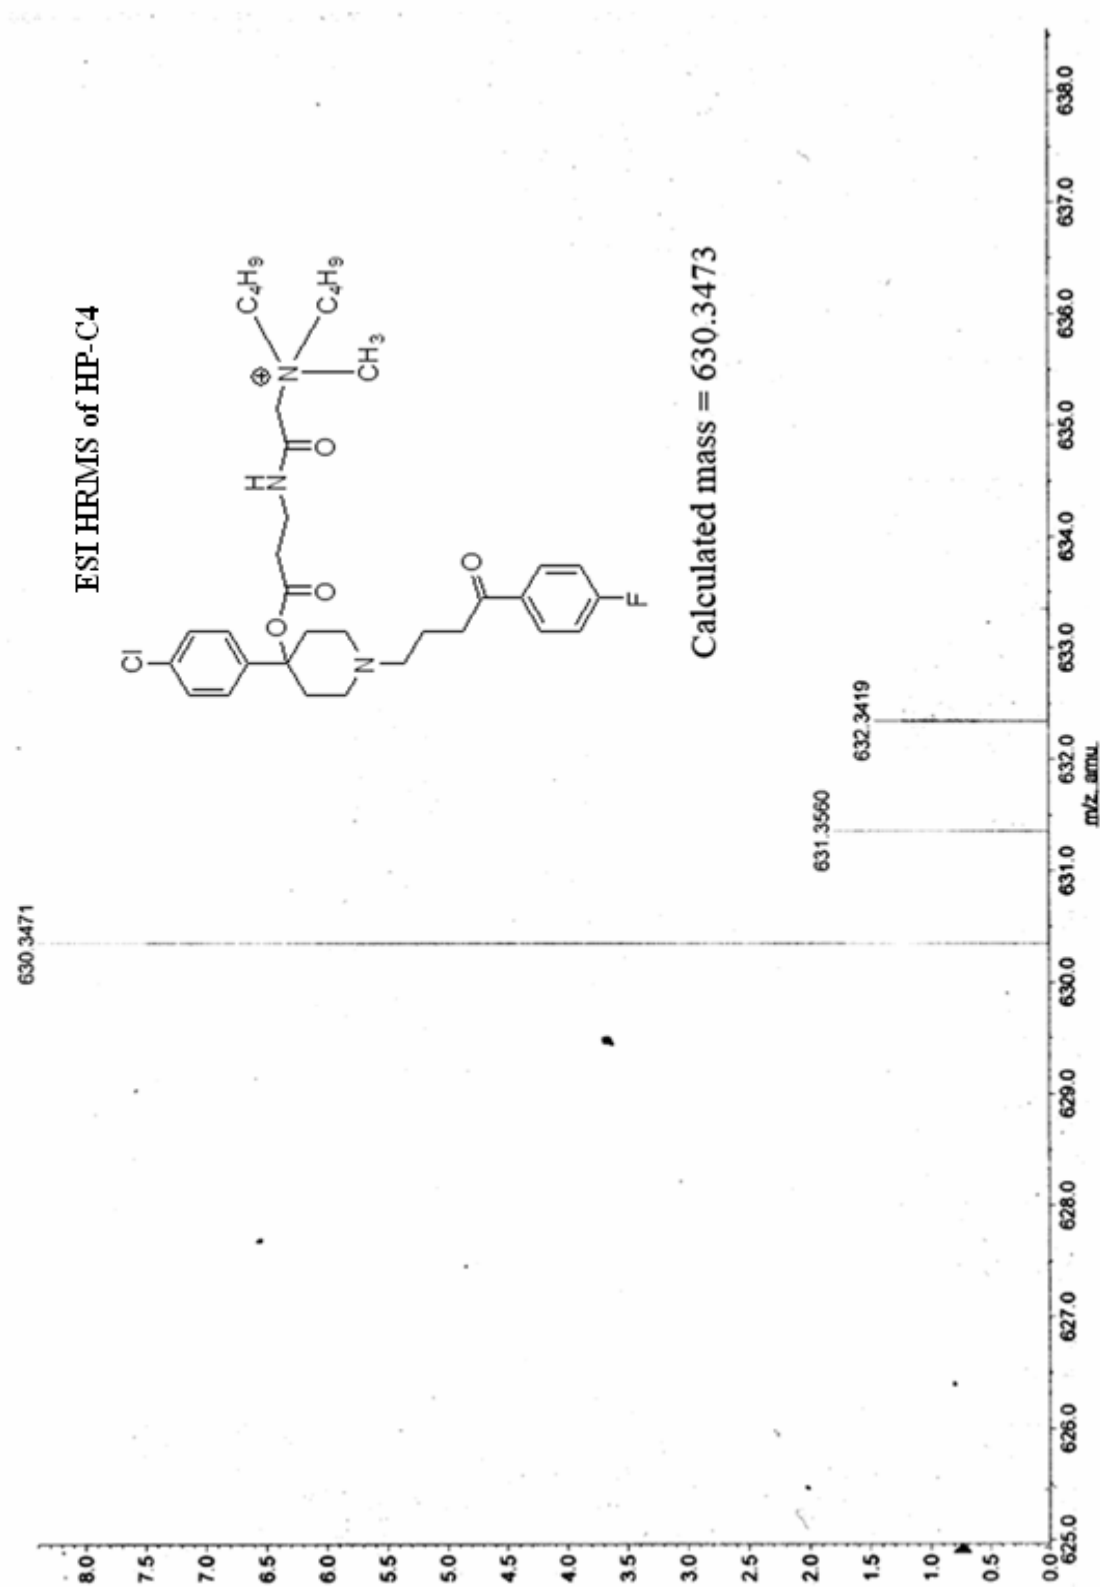

<sup>1</sup>H NMR spectrum of HP-C8

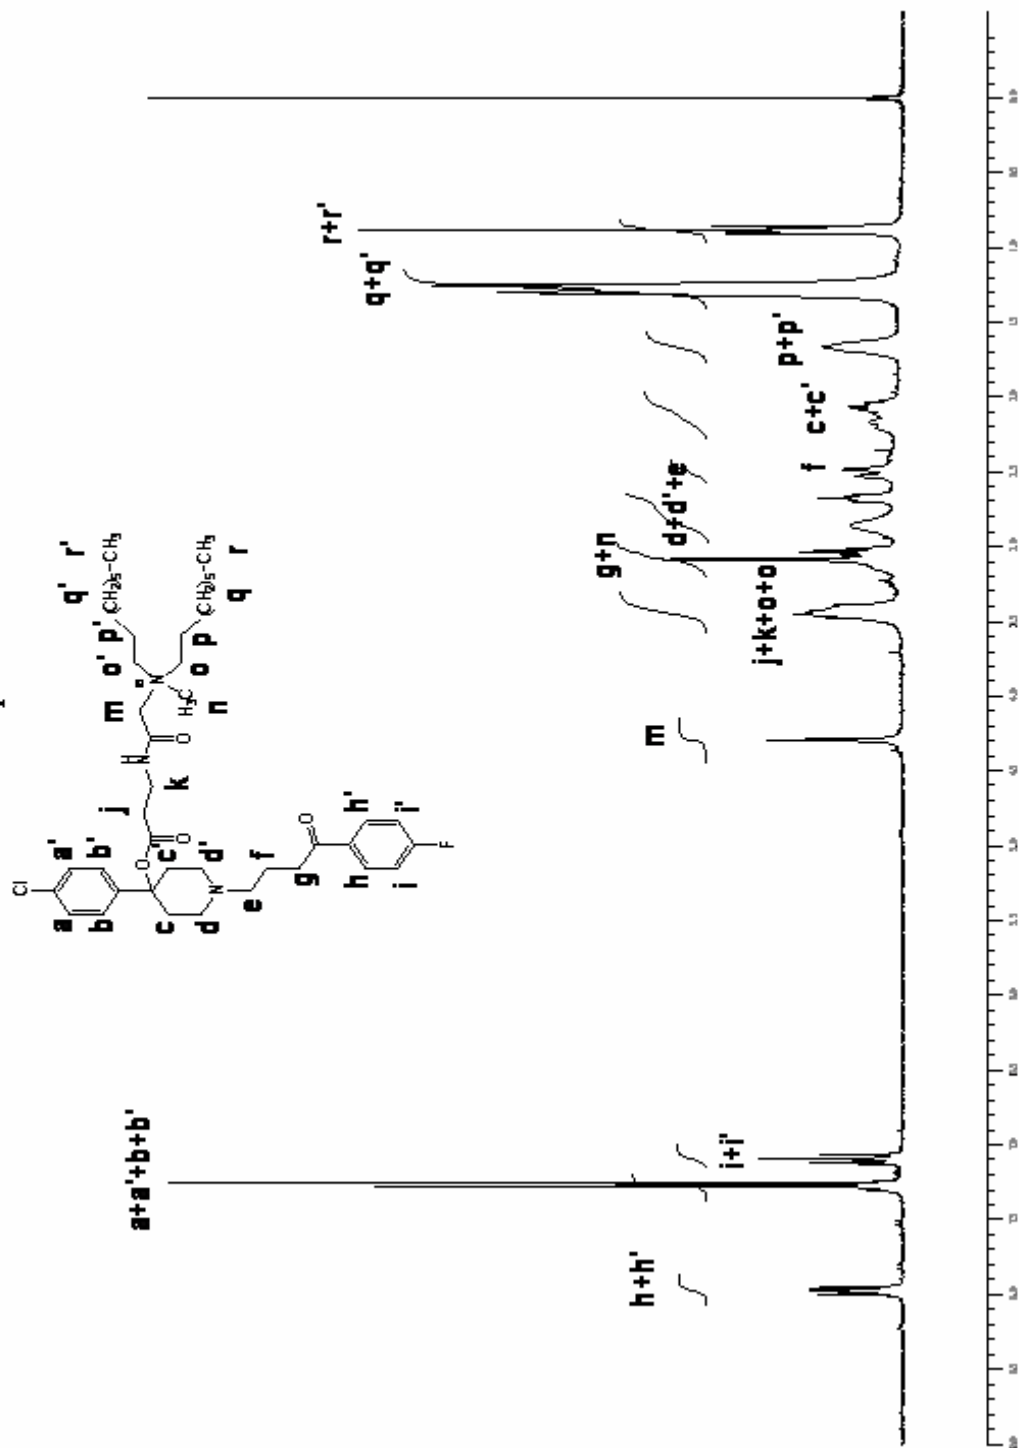

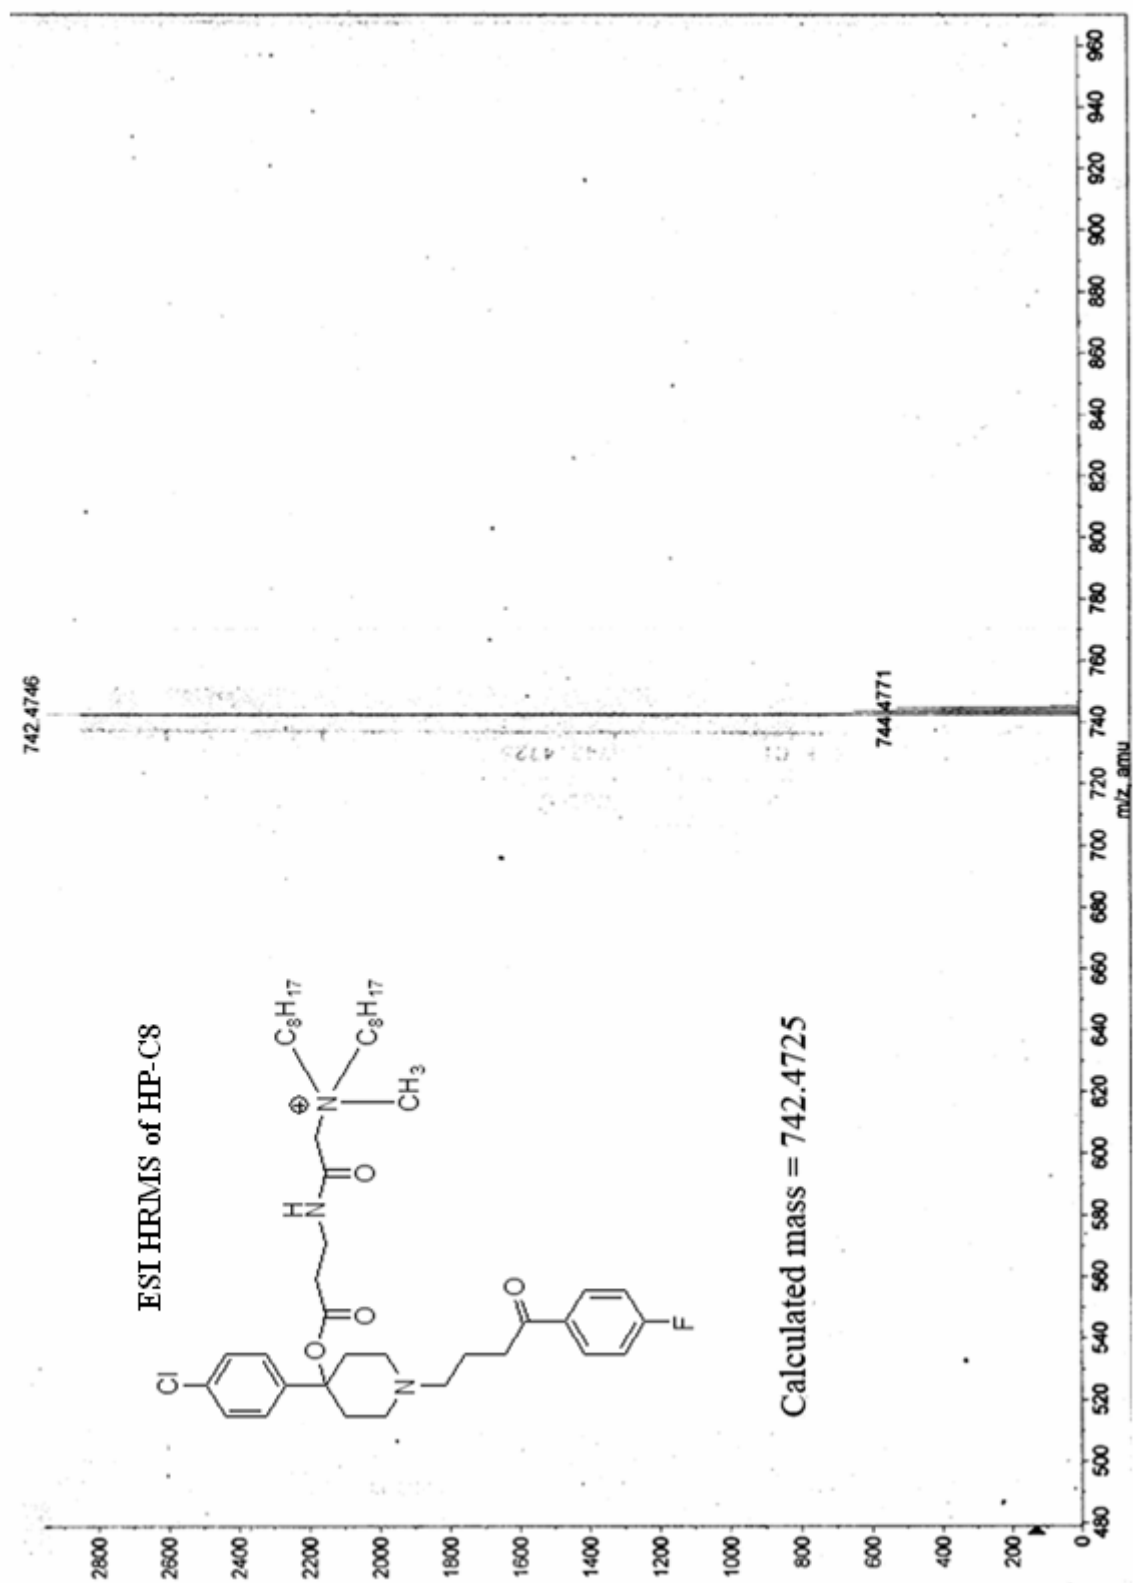

<sup>1</sup>H NMR spectrum of HP-C12

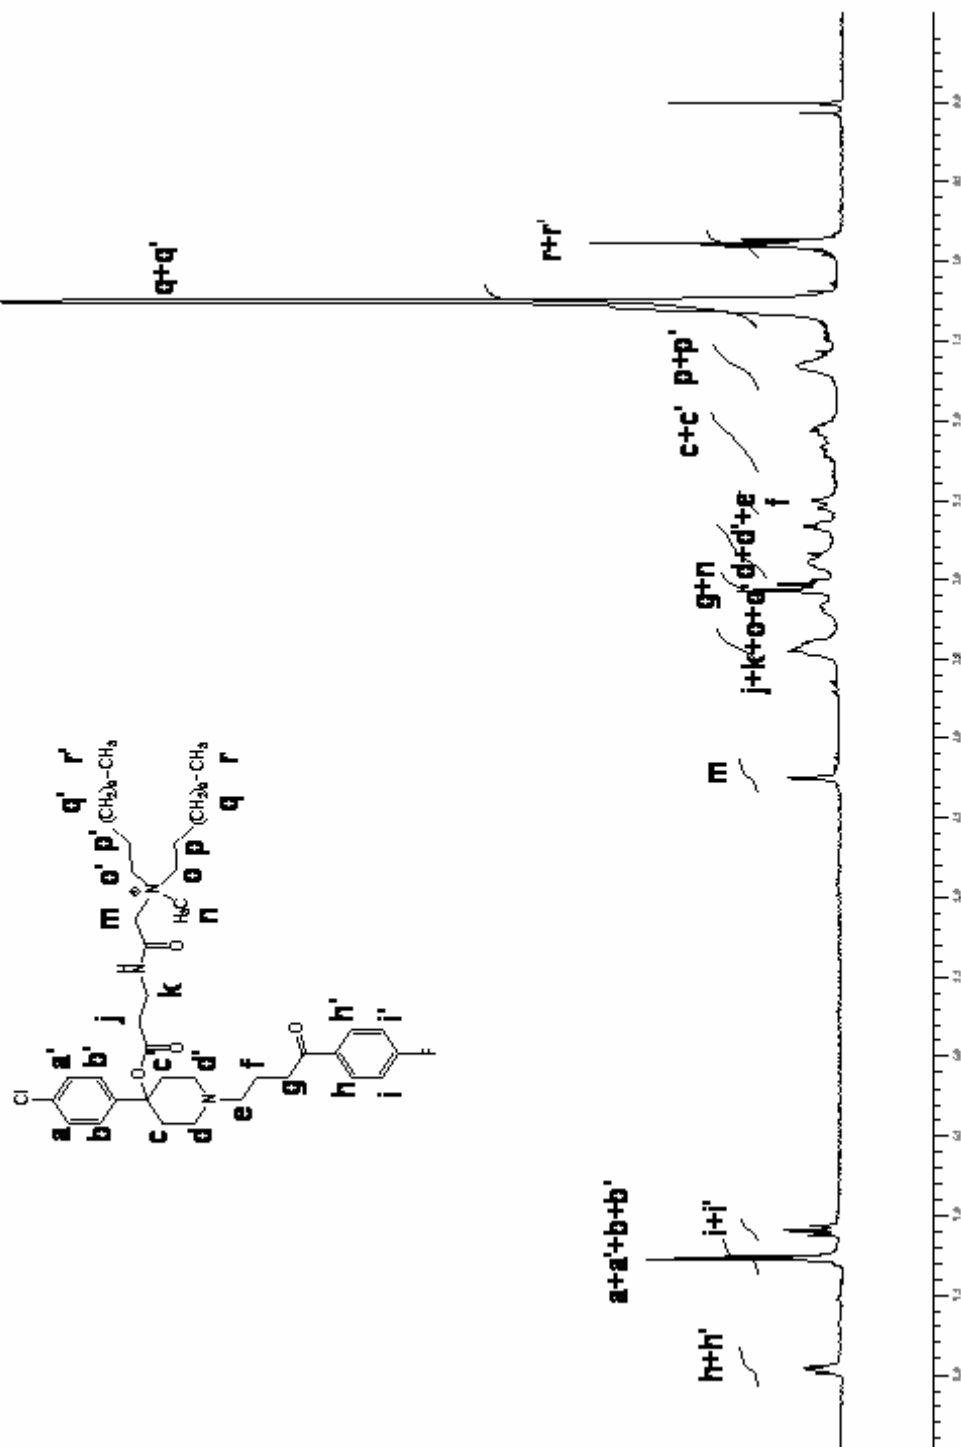

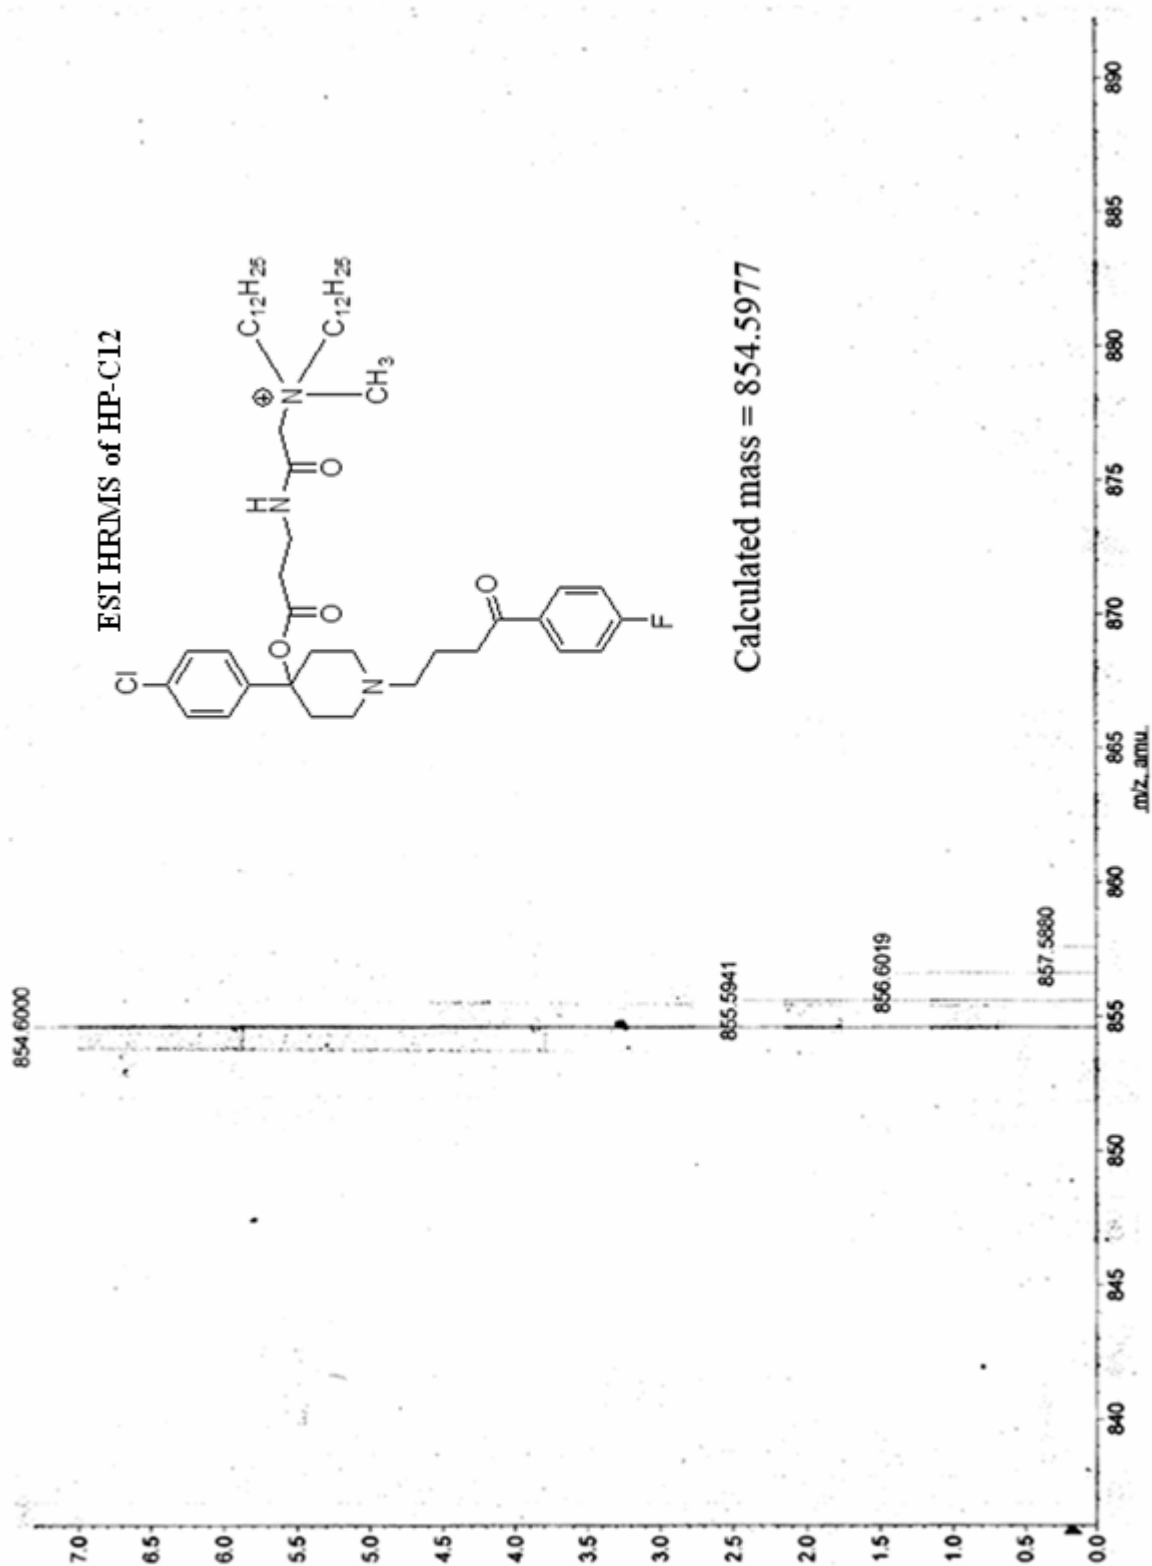



<sup>1</sup>H NMR spectrum of HP-C16

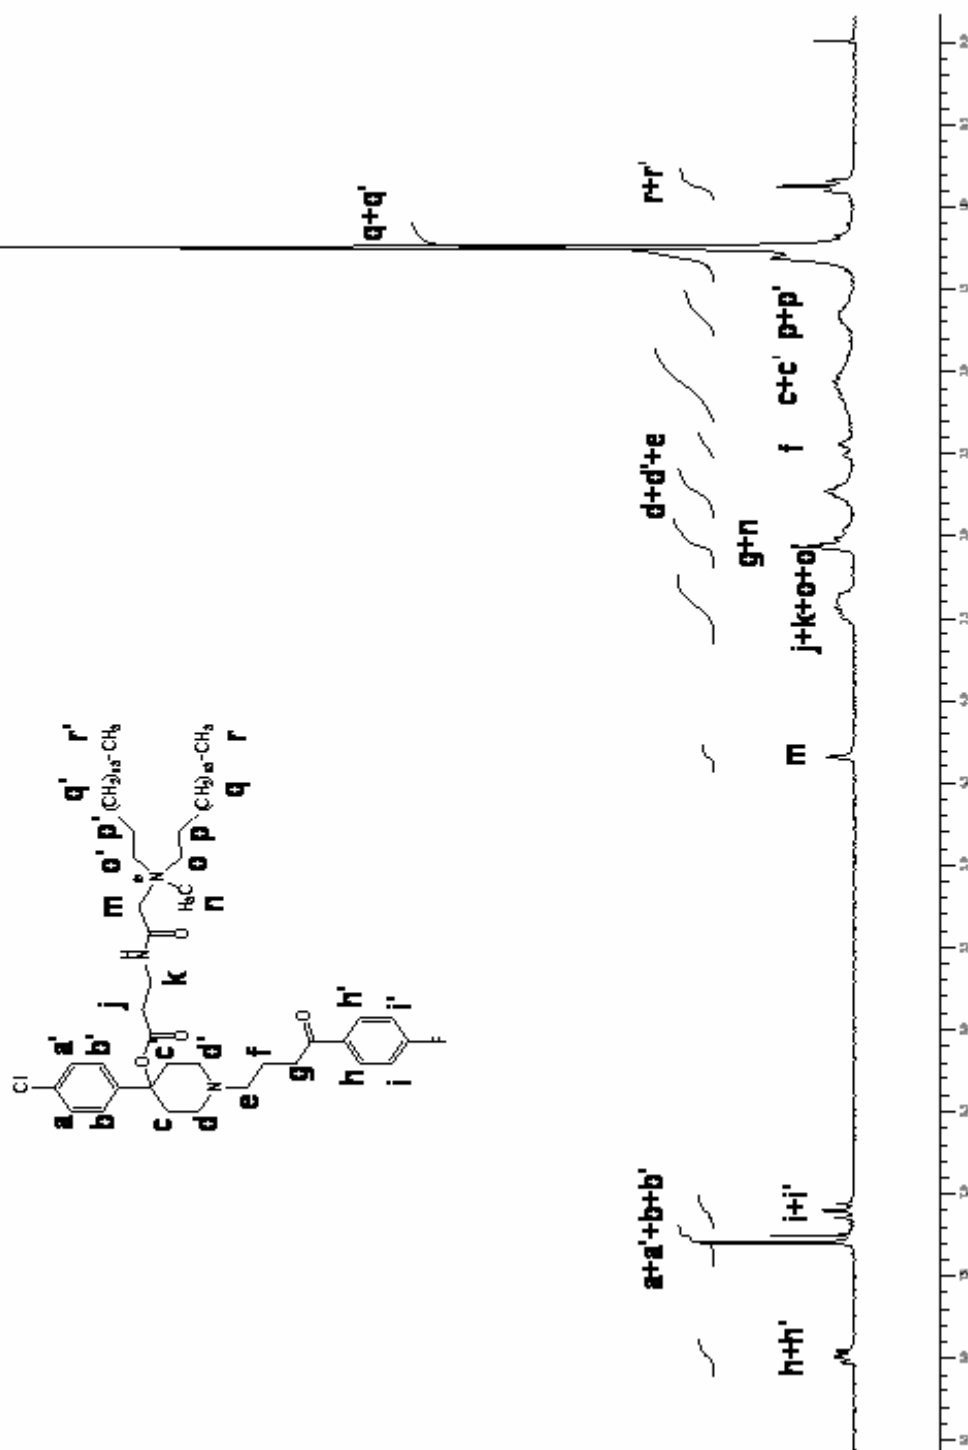

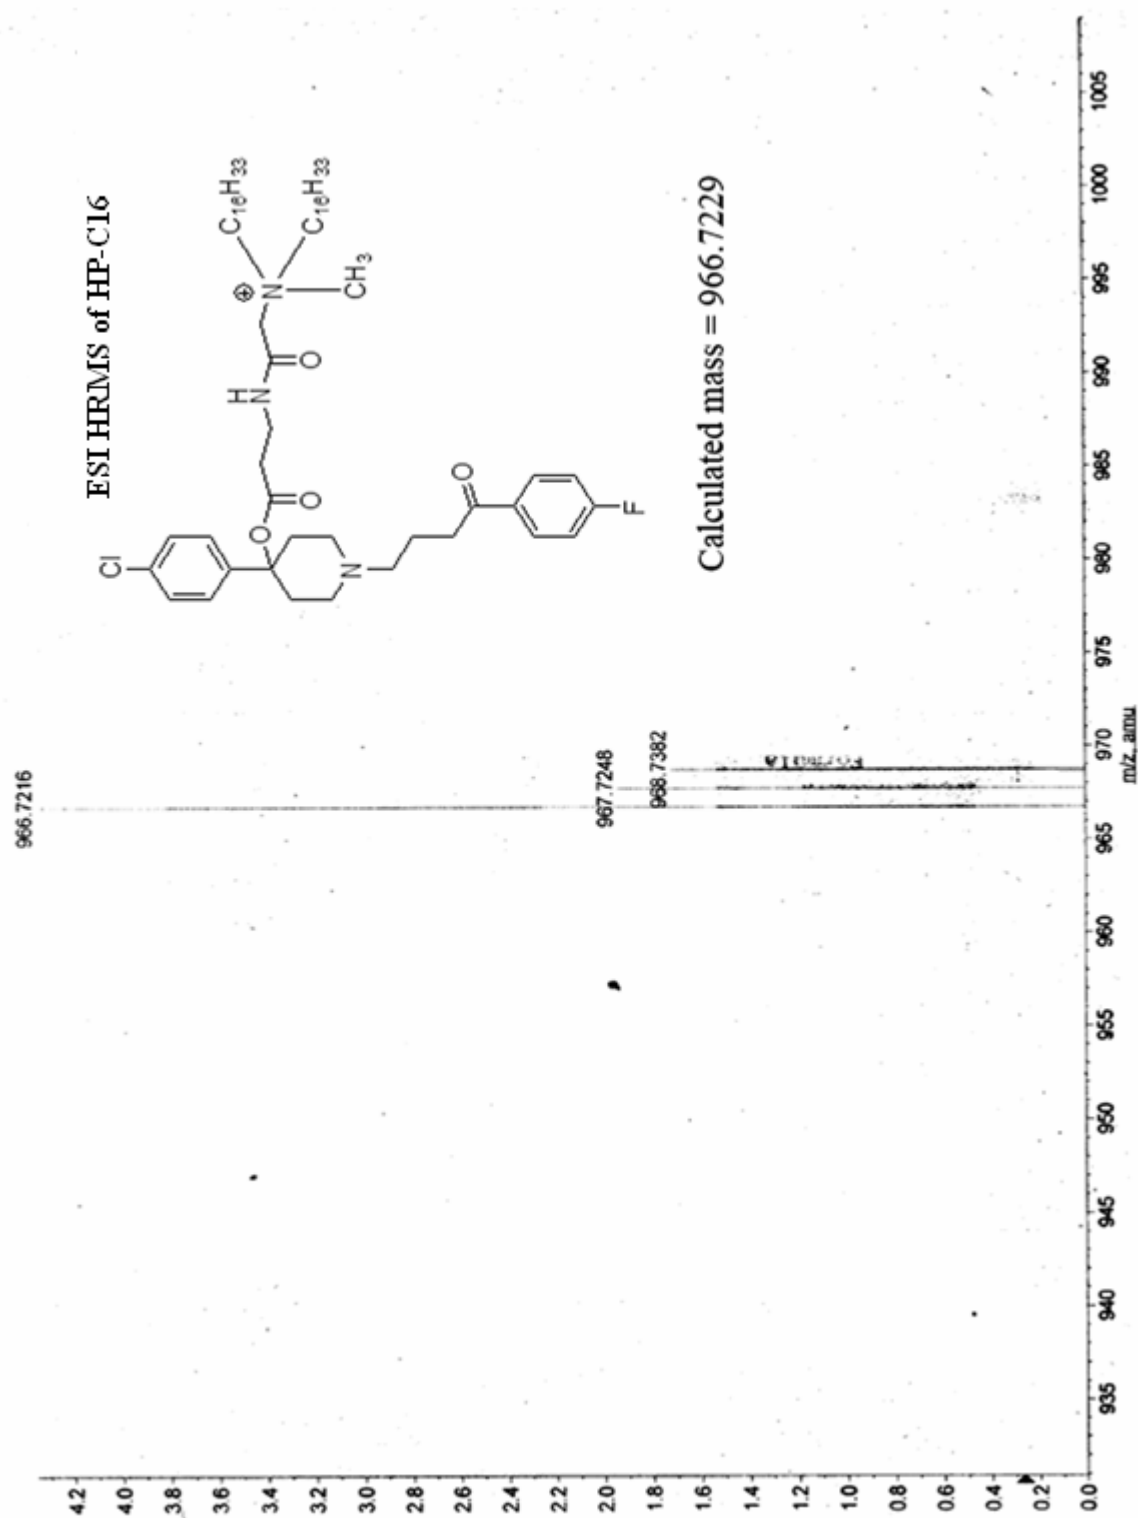

## HPLC Diagrams of Synthesized Derivatives

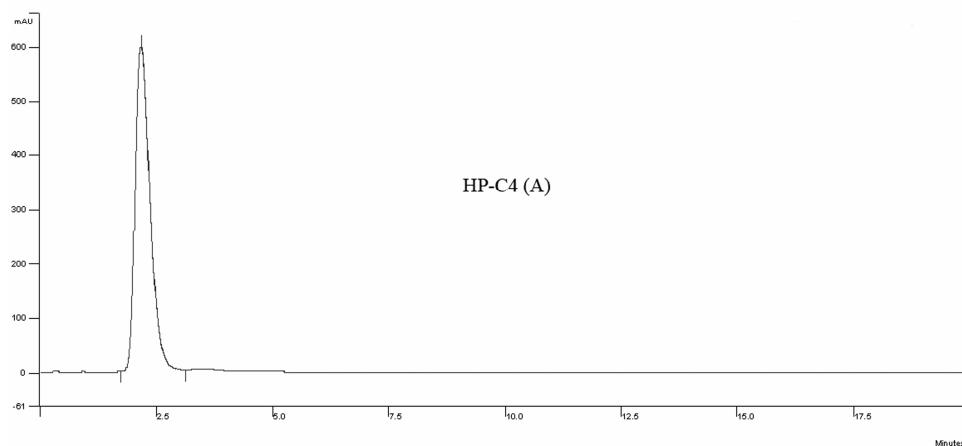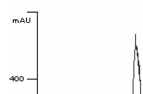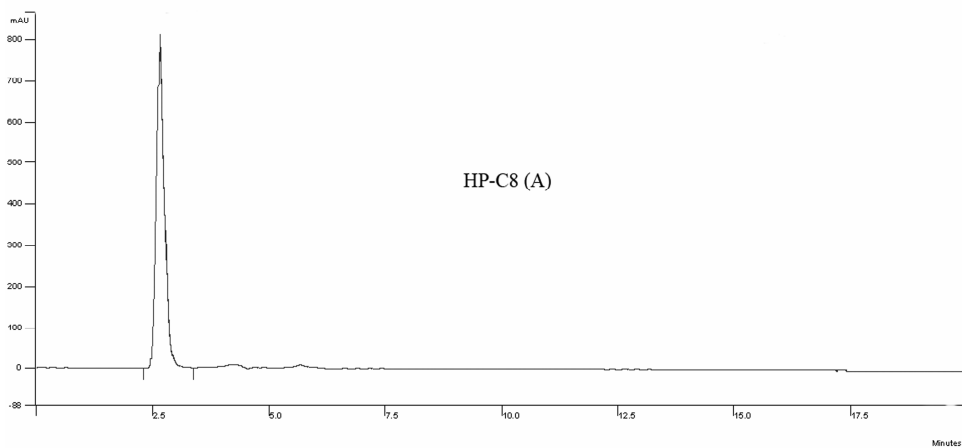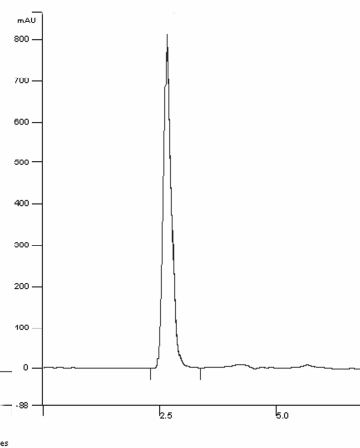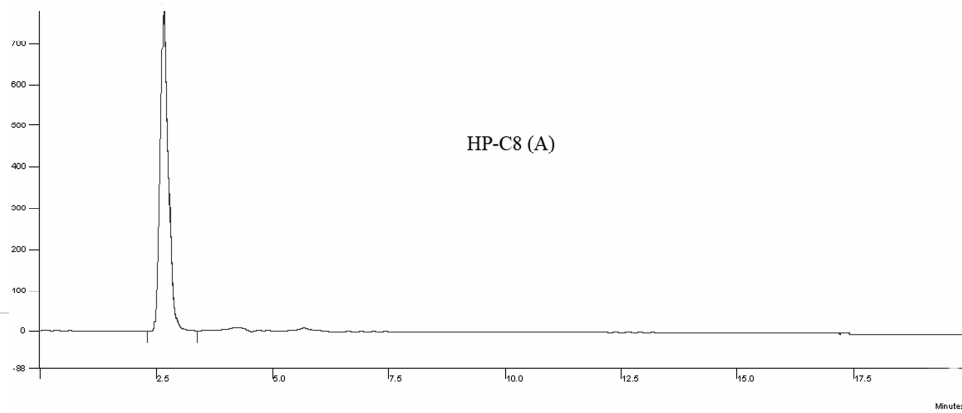

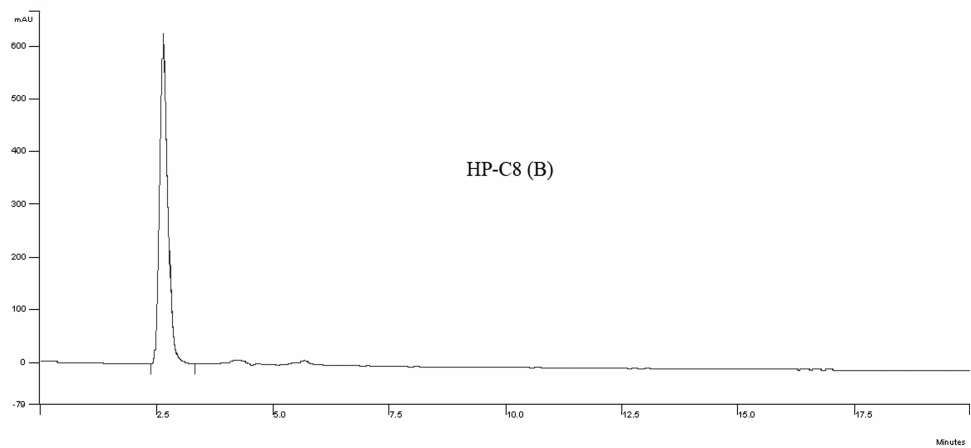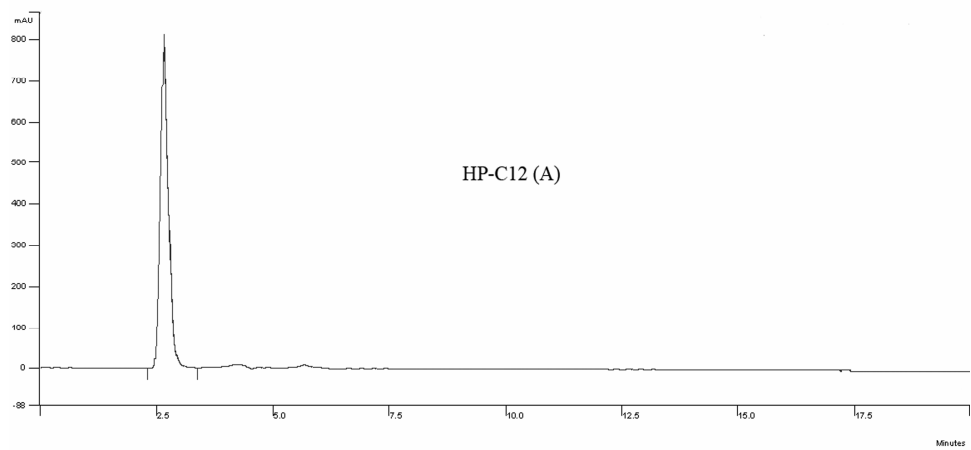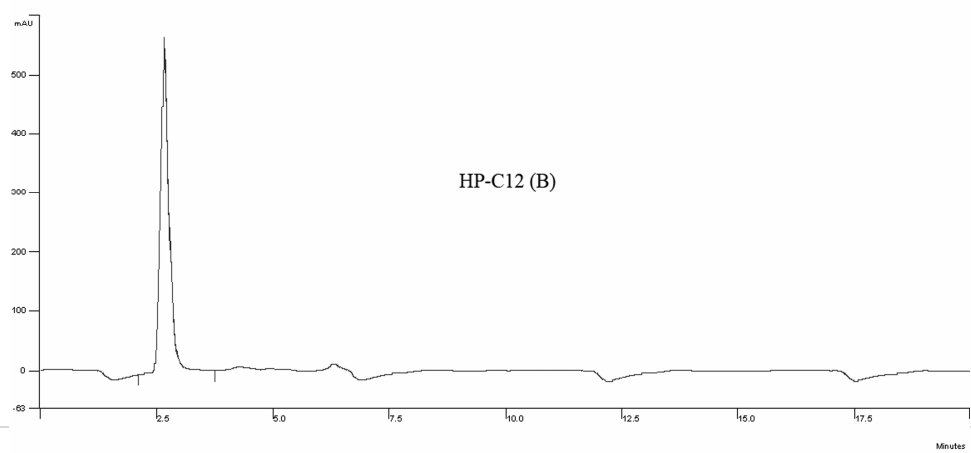

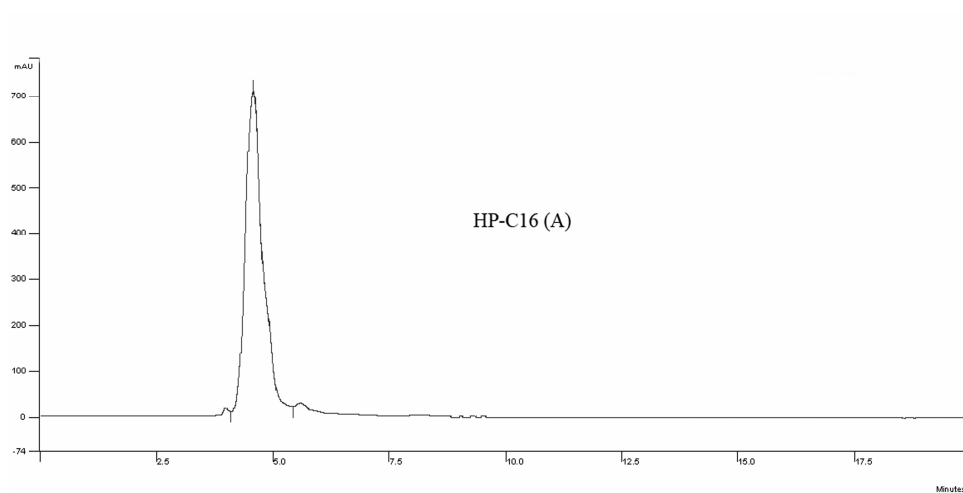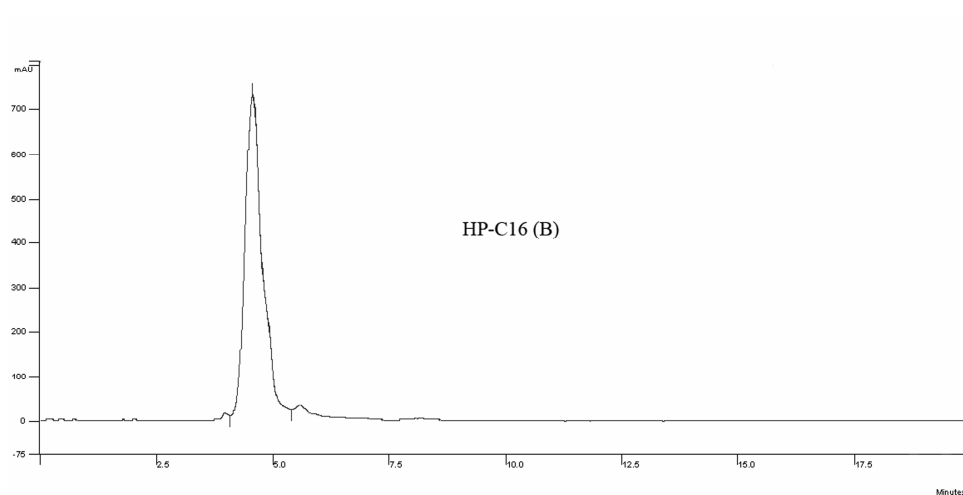

### HPLC Conditions:

System : Varian ProStar HPLC

Column : Varian microorb 100-10 BDS column (4.6 mm×250 mm)

Mobile Phase : A- Methanol  
B- Methanol: Water (95:5)

Flow Rate : 1ml/min

Column Pressure : 55-60Kg/cm<sup>2</sup>

Temperature : 25<sup>0</sup>C

Wavelength : 210nm
